# Supplementary material
Source: publisher figshare collection journal article supplement (https://gsapubs.figshare.com/articles/dataset/_/22687981)
Supplement: Supplementary file 1 [file 1]

## Sheet: Sheet1
Unique sample ID	Latitude	Longitude	Corrected age (14C a BP)	Corrected age uncertainty (14C a)	Age (cal a BP)	Age 2σ Uncertainty + (cal a)	Age 2σ Uncertainty - (cal a)	Sample depth/ Overburden thickness (m)	Sample thickness (m)	Sampling uncertainty (m)	Core shortening/stretching uncertainty (m)	Non-vertical drilling uncertainty (m)	Leveling uncertainty (m)	(d)GPS or RTK uncertainty (m)	Benchmark uncertainty (m)	Sample elevation (m)	Elevation datum (m)	Sample elevation uncertainty + (m)	Sample elevation uncertainty - (m)	Sample indicative meaning	Reference water level (m)	Indicative range uncertainty (m)	RSL (m)	RSL 2σ Uncertainty + (m)	RSL 2σ Uncertainty - (m)
PPJ_FMA1	-6.57506	110.625	6340	40	6586	6758	6408	0.19	0.02	0.19	n/a	n/a	0.1	0.069	0.0707107	1.36296	MSL	0.234685	0.234685	0.53	-0.4775	0.265	1.84046	0.35398	0.35398
PPJ_FMA2	-6.57506	110.625	6320	40	6564	6736	6392	0.15	0.02	0.15	n/a	n/a	0.1	0.112	0.0707107	0.985961	MSL	0.221946	0.221946	0.53	-0.4775	0.265	1.46346	0.345666	0.345666
PPJ_FMA3	-6.57506	110.625	6310	40	6553	6730	6385	0.13	0.02	0.13	n/a	n/a	0.1	0.137	0.0707107	0.907961	MSL	0.22335	0.22335	0.53	-0.4775	0.265	1.38546	0.346569	0.346569
PPJ_FMA4	-6.57505	110.625	6330	40	6575	6744	6398	0.13	0.02	0.13	n/a	n/a	0.1	0.084	0.0707107	0.681961	MSL	0.195377	0.195377	0.53	-0.4775	0.265	1.15946	0.329237	0.329237
PPJ_FMA5	-6.57504	110.625	6340	40	6586	6758	6408	0.24	0.02	0.24	n/a	n/a	0.1	0.065	0.0707107	0.778961	MSL	0.275755	0.275755	0.53	-0.4775	0.265	1.25646	0.382447	0.382447
PPJ_FMA6	-6.57591	110.625	6250	40	6488	6654	6314	0.16	0.02	0.16	n/a	n/a	0.1	0.113	0.0707107	0.802961	MSL	0.229314	0.229314	0.53	-0.4775	0.265	1.28046	0.350443	0.350443
PPJ_FMA7	-6.57798	110.628	6490	30	6759	6934	6599	0.12	0.02	0.12	n/a	n/a	0.1	0.092	0.0707107	0.650961	MSL	0.192562	0.192562	1.6479	-0.286724	0.823952	0.937685	0.846154	0.846154
PPJ_FMA8	-6.57767	110.627	6500	40	6771	6953	6597	0.15	0.02	0.15	n/a	n/a	0.1	0.143	0.0707107	0.908961	MSL	0.239092	0.239092	1.6479	-0.286724	0.823952	1.19569	0.857941	0.857941
PPJ_FMA10	-6.57579	110.626	6410	40	6668	6848	6485	n/a	0.02	n/a	n/a	n/a	0.1	0.12	0.0707107	1.32	MSL	0.169163	0.169163	0.53	-0.4775	0.265	1.7975	0.31439	0.31439
PPJ_CB1	-6.57486	110.625	6350	40	6598	6774	6421	n/a	n/a	n/a	n/a	n/a	0.1	0.036	0.0707107	0.223961	MSL	0.127656	0.127656	Below LAT	n/a	n/a	n/a	0.127656	0.127656
PPJ_CB2	-6.57501	110.625	6330	40	6575	6744	6398	n/a	n/a	n/a	n/a	n/a	0.1	0.214	0.0707107	0.347961	MSL	0.246568	0.246568	Below LAT	n/a	n/a	n/a	0.246568	0.246568
PPJ_CB3	-6.57521	110.625	6380	35	6633	6800	6452	n/a	n/a	n/a	n/a	n/a	0.1	0.193	0.0707107	0.363961	MSL	0.22858	0.22858	Below LAT	n/a	n/a	n/a	0.22858	0.22858
PPJ_CB4	-6.57521	110.625	6280	35	6521	6685	6348	n/a	n/a	n/a	n/a	n/a	0.1	0.183	0.0707107	0.137961	MSL	0.220202	0.220202	Below LAT	n/a	n/a	n/a	0.220202	0.220202

## Sheet: G51038
Mann, T., et al., 2023, Fossil Java Sea corals record Laurentide ice sheet disappearance: Geology, https://doi.org/10.1130/G51038.1
